# Supplementary material for: Clinically Relevant Interactions with Anti-Infectives on Intensive Care Units—A Multicenter Delphi Study
Source: MDPI journal article supplement (doi:10.3390/antibiotics10111330), 2021-10-31
Supplement: s1 [file s1]

**Table S1:** Tally of 88 different binary drug-drug interactions (DDIs) listed in the ADKA-DokuPIK database at least twice and including at least one anti-infective agent (total n= 455 interactions)

| Drug 1         | Drug 2         | n  |
|----------------|----------------|----|
| Clarithromycin | Simvastatin    | 43 |
| Meropenem      | Valproic acid  | 37 |
| Erythromycin   | Simvastatin    | 25 |
| Voriconazole   | Tacrolimus     | 21 |
| Ciprofloxacin  | Calcium        | 15 |
| Clarithromycin | Tacrolimus     | 15 |
| Voriconazole   | Simvastatin    | 13 |
| Fluconazole    | Tacrolimus     | 12 |
| Ciprofloxacin  | Amiodarone     | 10 |
| Erythromycin   | Atorvastatin   | 9  |
| Posaconazole   | Pantoprazole   | 9  |
| Caspofungin    | Cyclosporine   | 8  |
| Voriconazole   | Cyclosporine   | 8  |
| Voriconazole   | Rifampicin     | 8  |
| Clarithromycin | Cyclosporine   | 7  |
| Ciprofloxacin  | Citalopram     | 6  |
| Ciprofloxacin  | Mirtazapine    | 6  |
| Linezolid      | Norepinephrine | 6  |
| Clarithromycin | Atorvastatin   | 5  |
| Clarithromycin | Carbamazepine  | 5  |
| Erythromycin   | Quetiapine     | 5  |
| Fluconazole    | Simvastatin    | 5  |
| Imipenem       | Valproic acid  | 5  |
| Linezolid      | Citalopram     | 5  |
| Linezolid      | Mirtazapine    | 5  |
| Posaconazole   | Ranitidine     | 5  |
| Azithromycin   | Atorvastatin   | 4  |
| Erythromycin   | Sufentanil     | 4  |
| Erythromycin   | Tacrolimus     | 4  |
| Linezolid      | Piritramide    | 4  |
| Moxifloxacin   | Amiodarone     | 4  |
| Posaconazole   | Cyclosporine   | 4  |
| Ceftriaxone    | Calcium        | 3  |
| Ciprofloxacin  | Amitriptyline  | 3  |
| Ciprofloxacin  | Haloperidol    | 3  |
| Ciprofloxacin  | Theophylline   | 3  |
| Clarithromycin | Amiodarone     | 3  |
| Clarithromycin | Fluvastatin    | 3  |
| Clarithromycin | Haloperidol    | 3  |
| Clarithromycin | Ivabradine     | 3  |
| Clarithromycin | Moxifloxacin   | 3  |
| Clarithromycin | Theophylline   | 3  |

|                      |                               |   |
|----------------------|-------------------------------|---|
| Erythromycin         | Mirtazapine                   | 3 |
| Fluconazole          | Cyclosporine                  | 3 |
| Levofloxacin         | Amiodarone                    | 3 |
| Linezolid            | Fentanyl                      | 3 |
| Moxifloxacin         | Mirtazapine                   | 3 |
| Moxifloxacin         | Prednisolone                  | 3 |
| Rifampicin           | Fluvastatin                   | 3 |
| Rifampicin           | Paracetamol (Acetaminophen)   | 3 |
| Teicoplanin          | Furosemide                    | 3 |
| Voriconazole         | Atorvastatin                  | 3 |
| Voriconazole         | Clopidogrel                   | 3 |
| Ampicillin-sulbactam | Allopurinol                   | 2 |
| Azithromycin         | Citalopram                    | 2 |
| Azithromycin         | Haloperidol                   | 2 |
| Caspofungin          | Albumin                       | 2 |
| Ceftriaxon           | Heparin                       | 2 |
| Ciprofloxacin        | Iron                          | 2 |
| Ciprofloxacin        | Melatonin                     | 2 |
| Ciprofloxacin        | Simvastatin                   | 2 |
| Clarithromycin       | Amlodipine                    | 2 |
| Clarithromycin       | Trimethoprim-sulfamethoxazole | 2 |
| Clarithromycin       | Tamsulosin                    | 2 |
| Daptomycin           | Atorvastatin                  | 2 |
| Daptomycin           | Simvastatin                   | 2 |
| Erythromycin         | Amiodarone                    | 2 |
| Erythromycin         | Carbamazepine                 | 2 |
| Erythromycin         | Cyclosporine                  | 2 |
| Erythromycin         | Haloperidol                   | 2 |
| Erythromycin         | Melperone                     | 2 |
| Erythromycin         | Midazolam                     | 2 |
| Fluconazole          | Atorvastatin                  | 2 |
| Fluconazole          | Carbamazepine                 | 2 |
| Itraconazole         | Simvastatin                   | 2 |
| Levofloxacin         | Haloperidol                   | 2 |
| Linezolid            | Moclobemide                   | 2 |
| Linezolid            | Sufentanil                    | 2 |
| Moxifloxacin         | Citalopram                    | 2 |
| Posaconazole         | Atorvastatin                  | 2 |
| Posaconazole         | Carbamazepine                 | 2 |
| Posaconazole         | Tacrolimus                    | 2 |
| Rifampicin           | Cyclosporine                  | 2 |
| Rifampicin           | Clopidogrel                   | 2 |
| Rifampicin           | Fluconazole                   | 2 |
| Rifampicin           | Simvastatin                   | 2 |
| Rifampicin           | Ticagrelor                    | 2 |
| Voriconazole         | Sildenafil                    | 2 |

**Table S2:** DDI (n= 17) including anti-infectives rated not clinically relevant by expert panel

| Group          | Drug 1               | Drug 2                        | Mode category <sup>1</sup> |
|----------------|----------------------|-------------------------------|----------------------------|
| Penicillins    | Ampicillin-sulbactam | Allopurinol                   | 2                          |
| Cephalosporins | Ceftriaxone          | Heparin                       | 1                          |
| Macrolides     | Azithromycin         | Atorvastatin                  | 2                          |
|                |                      | Fluvastatin                   | 1                          |
|                |                      | Amlodipine                    | 2                          |
|                |                      | Trimethoprim-sulfamethoxazole | 1                          |
|                | Erythromycin         | Sufentanil                    | 2                          |
|                |                      | Mirtazapine                   | 1                          |
|                |                      | Midazolam                     | 2                          |
| Glycopeptides  | Teicoplanin          | Furosemide                    | 1                          |
| Antifungals    | Caspofungin          | Albumin                       | 1                          |
| Miscellaneous  | Linezolid            | Norepinephrine                | 2                          |
|                |                      | Citalopram                    | 2                          |
|                |                      | Piritramide                   | 2                          |
|                |                      | Fentanyl                      | 2                          |
|                |                      | Sufentanil                    | 2                          |
|                | Rifampicin           | Fluvastatin                   | 1                          |

**Mode category 1:** “Not clinical relevant, since adverse effects of this DDI are negligible.” **Mode category 2:** “Clinically relevant, the adverse effects of this DDI will however be limited since routine monitoring to timely identify adverse effects is present” [15].

**Table S3:** DDIs (n= 6) including anti-infectives resulting in low agreement of the expert panel

| Group            | Drug 1         | Drug 2                         | Discussion that led to low agreement                                                                                                                                                                                                   |
|------------------|----------------|--------------------------------|----------------------------------------------------------------------------------------------------------------------------------------------------------------------------------------------------------------------------------------|
| Fluoroquinolones | Ciprofloxacin  | Citalopram                     | QTc-Monitoring is handled differently in German ICU either as routine or as additional monitoring procedure;<br>SmPC citalopram: CI with ciprofloxacin                                                                                 |
| Macrolides       | Clarithromycin | Tamsulosin                     | Usually in ICU tamsulosin is withheld when a urinary bladder catheter is placed, in which case the interaction is irrelevant. However, when tamsulosin is continued, a possible hypotension was acknowledged.                          |
| Antifungals      | Posaconazole   | Ranitidine/<br>Famotidine      | If both drugs are given orally, Posaconazole levels might be decreased. However, Posaconazole is often administered intravenously and TDM of Posaconazole often in place.                                                              |
|                  | Voriconazole   | Clopidogrel                    | Clinical relevance of this interaction was questioned especially in long-term clopidogrel therapy.<br>Testing of platelet-function may be considered.                                                                                  |
| Miscellaneous    | Linezolid      | Moclobemide                    | Serotonine syndrome is a rare but severe adverse drug reaction, so monitoring is recommended; SmPC linezolid: CI with moclobemide.                                                                                                     |
|                  | Rifampicin     | Paracetamol<br>(Acetaminophen) | Clinical relevance for ICU in short-term combination is questioned. Routine monitoring of liver function is recommended.<br>Long-term combination therapy should be avoided, especially without frequent monitoring of liver function. |

CI= contraindication; QTc= Rate-corrected QT interval; SmPC= summary of product characteristics; TDM= Therapeutic Drug Monitoring
